# Supplementary material for: Computational analysis of the solvation of coffee ingredients in aqueous ionic liquid mixtures
Source: Royal Society of Chemistry journal article supplement (doi:10.1039/c6ra24736a), 2017-01-01
Supplement: c6ra24736a1.pdf [file c6ra24736a1.pdf]

# Computational analysis of the solvation of coffee ingredients in aqueous ionic liquid mixtures

Veronika Zeindlhofer, Diana Khlan, Katharina Bica, and Christian Schröder\*

Abstract

## CONTENTS

|                                       |    |
|---------------------------------------|----|
| Force field of the coffee ingredients | 2  |
| Force field of the solvents           | 16 |
| Hydrogen bonds and extraction yields  | 22 |

# FORCE FIELD OF THE COFFEE INGREDIENTS

```

=====
*. Force field of the solute species
=====

```

\*

READ RTF CARD

```

*.....

```

\*. Topology of the solutes

```

*.....

```

\*

99 1

|      |     |      |        |
|------|-----|------|--------|
| MASS | 101 | C5A  | 12.011 |
| MASS | 102 | C5B  | 12.011 |
| MASS | 103 | C=C  | 12.011 |
| MASS | 104 | C=O  | 12.011 |
| MASS | 105 | CB   | 12.011 |
| MASS | 106 | CR   | 12.011 |
| MASS | 107 | HCMM | 1.008  |
| MASS | 108 | HOCC | 1.008  |
| MASS | 109 | HOCO | 1.008  |
| MASS | 110 | N5B  | 14.007 |
| MASS | 111 | NC=O | 14.007 |
| MASS | 112 | NPYL | 14.007 |
| MASS | 113 | O=C  | 15.999 |
| MASS | 114 | OR   | 15.999 |

```

! ~~~~~
! caffeine
! ~~~~~

```

RESIDUE CAFF 0.00000

GROUP

|      |     |      |          |
|------|-----|------|----------|
| ATOM | N1  | NPYL | 0.16234  |
| ATOM | C1  | CR   | -0.27493 |
| ATOM | H11 | HCMM | 0.13334  |
| ATOM | H12 | HCMM | 0.1324   |
| ATOM | H13 | HCMM | 0.10401  |
| ATOM | C2  | C5A  | 0.07055  |
| ATOM | H2  | HCMM | 0.12982  |
| ATOM | N3  | N5B  | -0.47609 |
| ATOM | C4  | C5B  | 0.46692  |
| ATOM | N5  | NC=O | -0.35029 |
| ATOM | C5  | CR   | 0.15421  |
| ATOM | H51 | HCMM | 0.02559  |
| ATOM | H52 | HCMM | 0.02849  |
| ATOM | H53 | HCMM | 0.00615  |
| ATOM | C6  | C=O  | 0.65534  |
| ATOM | O6  | O=C  | -0.51422 |
| ATOM | N7  | NC=O | -0.38795 |
| ATOM | C7  | CR   | 0.02136  |
| ATOM | H71 | HCMM | 0.05432  |
| ATOM | H72 | HCMM | 0.05368  |
| ATOM | H73 | HCMM | 0.05659  |
| ATOM | C8  | C=O  | 0.62056  |

|      |     |     |          |
|------|-----|-----|----------|
| ATOM | 08  | O=C | -0.4932  |
| ATOM | C9  | C5A | -0.37899 |
| BOND | C1  | N1  |          |
| BOND | C1  | H11 |          |
| BOND | C1  | H12 |          |
| BOND | C1  | H13 |          |
| BOND | N1  | C9  |          |
| BOND | N1  | C2  |          |
| BOND | C2  | N3  |          |
| BOND | C2  | H2  |          |
| BOND | N3  | C4  |          |
| BOND | C4  | N5  |          |
| BOND | C4  | C9  |          |
| BOND | N5  | C5  |          |
| BOND | C5  | H51 |          |
| BOND | C5  | H52 |          |
| BOND | C5  | H53 |          |
| BOND | C6  | N5  |          |
| BOND | C6  | O6  |          |
| BOND | N7  | C6  |          |
| BOND | N7  | C7  |          |
| BOND | C7  | H71 |          |
| BOND | C7  | H72 |          |
| BOND | C7  | H73 |          |
| BOND | C8  | N7  |          |
| BOND | C8  | O8  |          |
| BOND | C9  | C8  |          |
| ANGL | C1  | N1  | C2       |
| ANGL | C1  | N1  | C9       |
| ANGL | C2  | N1  | C9       |
| ANGL | C2  | N3  | C4       |
| ANGL | C4  | C9  | C8       |
| ANGL | C4  | C9  | N1       |
| ANGL | C4  | N5  | C5       |
| ANGL | C4  | N5  | C6       |
| ANGL | C5  | N5  | C6       |
| ANGL | C6  | N7  | C7       |
| ANGL | C6  | N7  | C8       |
| ANGL | C7  | N7  | C8       |
| ANGL | C8  | C9  | N1       |
| ANGL | C9  | C4  | N3       |
| ANGL | C9  | C4  | N5       |
| ANGL | C9  | C8  | N7       |
| ANGL | C9  | C8  | O8       |
| ANGL | H11 | C1  | H12      |
| ANGL | H11 | C1  | H13      |
| ANGL | H11 | C1  | N1       |
| ANGL | H12 | C1  | H13      |
| ANGL | H12 | C1  | N1       |
| ANGL | H13 | C1  | N1       |
| ANGL | H2  | C2  | N1       |
| ANGL | H2  | C2  | N3       |
| ANGL | H51 | C5  | H52      |
| ANGL | H51 | C5  | H53      |
| ANGL | H51 | C5  | N5       |
| ANGL | H52 | C5  | H53      |
| ANGL | H52 | C5  | N5       |

|      |     |    |     |     |
|------|-----|----|-----|-----|
| ANGL | H53 | C5 | N5  |     |
| ANGL | H71 | C7 | H72 |     |
| ANGL | H71 | C7 | H73 |     |
| ANGL | H71 | C7 | N7  |     |
| ANGL | H72 | C7 | H73 |     |
| ANGL | H72 | C7 | N7  |     |
| ANGL | H73 | C7 | N7  |     |
| ANGL | N1  | C2 | N3  |     |
| ANGL | N3  | C4 | N5  |     |
| ANGL | N5  | C6 | N7  |     |
| ANGL | N5  | C6 | O6  |     |
| ANGL | N7  | C6 | O6  |     |
| ANGL | N7  | C8 | O8  |     |
| DIHE | C1  | N1 | C2  | H2  |
| DIHE | C1  | N1 | C2  | N3  |
| DIHE | C1  | N1 | C9  | C4  |
| DIHE | C1  | N1 | C9  | C8  |
| DIHE | C2  | N1 | C1  | H11 |
| DIHE | C2  | N1 | C1  | H12 |
| DIHE | C2  | N1 | C1  | H13 |
| DIHE | C2  | N1 | C9  | C4  |
| DIHE | C2  | N1 | C9  | C8  |
| DIHE | C2  | N3 | C4  | C9  |
| DIHE | C2  | N3 | C4  | N5  |
| DIHE | C4  | C9 | C8  | N7  |
| DIHE | C4  | C9 | C8  | O8  |
| DIHE | C4  | N3 | C2  | H2  |
| DIHE | C4  | N3 | C2  | N1  |
| DIHE | C4  | N5 | C5  | H51 |
| DIHE | C4  | N5 | C5  | H52 |
| DIHE | C4  | N5 | C5  | H53 |
| DIHE | C4  | N5 | C6  | N7  |
| DIHE | C4  | N5 | C6  | O6  |
| DIHE | C5  | N5 | C4  | C9  |
| DIHE | C5  | N5 | C4  | N3  |
| DIHE | C5  | N5 | C6  | N7  |
| DIHE | C5  | N5 | C6  | O6  |
| DIHE | C6  | N5 | C4  | C9  |
| DIHE | C6  | N5 | C4  | N3  |
| DIHE | C6  | N5 | C5  | H51 |
| DIHE | C6  | N5 | C5  | H52 |
| DIHE | C6  | N5 | C5  | H53 |
| DIHE | C6  | N7 | C7  | H71 |
| DIHE | C6  | N7 | C7  | H72 |
| DIHE | C6  | N7 | C7  | H73 |
| DIHE | C6  | N7 | C8  | C9  |
| DIHE | C6  | N7 | C8  | O8  |
| DIHE | C7  | N7 | C6  | N5  |
| DIHE | C7  | N7 | C6  | O6  |
| DIHE | C7  | N7 | C8  | C9  |
| DIHE | C7  | N7 | C8  | O8  |
| DIHE | C8  | C9 | C4  | N3  |
| DIHE | C8  | C9 | C4  | N5  |
| DIHE | C8  | N7 | C6  | N5  |
| DIHE | C8  | N7 | C6  | O6  |
| DIHE | C8  | N7 | C7  | H71 |
| DIHE | C8  | N7 | C7  | H72 |

|      |    |     |    |     |
|------|----|-----|----|-----|
| DIHE | C8 | N7  | C7 | H73 |
| DIHE | C9 | N1  | C1 | H11 |
| DIHE | C9 | N1  | C1 | H12 |
| DIHE | C9 | N1  | C1 | H13 |
| DIHE | C9 | N1  | C2 | H2  |
| DIHE | C9 | N1  | C2 | N3  |
| DIHE | N1 | C9  | C4 | N3  |
| DIHE | N1 | C9  | C4 | N5  |
| DIHE | N1 | C9  | C8 | N7  |
| DIHE | N1 | C9  | C8 | O8  |
| IMPR | N1 | C2  | C9 | C1  |
| IMPR | C2 | N3  | N1 | H2  |
| IMPR | C9 | C4  | N1 | C8  |
| IMPR | C8 | N7  | C9 | O8  |
| IMPR | N7 | C6  | C8 | C7  |
| IMPR | C4 | C9  | N3 | N5  |
| IMPR | C6 | N5  | N7 | O6  |
| IMPR | N5 | C6  | C4 | C5  |
| IMPR | C1 | H11 | N1 | H12 |
| IMPR | C1 | H11 | N1 | H13 |
| IMPR | C5 | H51 | N5 | H52 |
| IMPR | C5 | H51 | N5 | H53 |
| IMPR | C7 | H71 | N7 | H72 |
| IMPR | C7 | H71 | N7 | H73 |

PATCHING FIRST NONE LAST NONE

```
! ~~~~~
! gallic acid
! ~~~~~
```

```
RESIDUE  GAL  0.00000
GROUP
ATOM     O3    OR    -0.65
ATOM     H5    HOCO   0.5
ATOM     C6    C=O   0.6338
ATOM     O4    O=C   -0.57
ATOM     C     CB    0.0862
ATOM     C1    CB    -0.15
ATOM     H     HCMM  0.15
ATOM     C2    CB    0.0825
ATOM     O2    OR   -0.5325
ATOM     H4    HOCC  0.45
ATOM     C3    CB    0.0825
ATOM     O1    OR   -0.5325
ATOM     H3    HOCC  0.45
ATOM     C4    CB    0.0825
ATOM     O     OR   -0.5325
ATOM     H2    HOCC  0.45
ATOM     C5    CB    -0.15
ATOM     H1    HCMM  0.15
BOND     C     C1
BOND     C     C5
BOND     C     C6
BOND     C1    C2
BOND     C1    H
BOND     C2    C3
BOND     C2    O2
BOND     C3    C4
```

|      |    |    |    |    |
|------|----|----|----|----|
| BOND | C3 | O1 |    |    |
| BOND | C4 | C5 |    |    |
| BOND | C4 | O  |    |    |
| BOND | C5 | H1 |    |    |
| BOND | O  | H2 |    |    |
| BOND | O1 | H3 |    |    |
| BOND | O2 | H4 |    |    |
| BOND | C6 | O3 |    |    |
| BOND | C6 | O4 |    |    |
| BOND | O3 | H5 |    |    |
| ANGL | C  | C1 | C2 |    |
| ANGL | C  | C1 | H  |    |
| ANGL | C  | C5 | C4 |    |
| ANGL | C  | C5 | H1 |    |
| ANGL | C  | C6 | O3 |    |
| ANGL | C  | C6 | O4 |    |
| ANGL | C1 | C  | C5 |    |
| ANGL | C1 | C  | C6 |    |
| ANGL | C1 | C2 | C3 |    |
| ANGL | C1 | C2 | O2 |    |
| ANGL | C2 | C1 | H  |    |
| ANGL | C2 | C3 | C4 |    |
| ANGL | C2 | C3 | O1 |    |
| ANGL | C2 | O2 | H4 |    |
| ANGL | C3 | C2 | O2 |    |
| ANGL | C3 | C4 | C5 |    |
| ANGL | C3 | C4 | O  |    |
| ANGL | C3 | O1 | H3 |    |
| ANGL | C4 | C3 | O1 |    |
| ANGL | C4 | C5 | H1 |    |
| ANGL | C4 | O  | H2 |    |
| ANGL | C5 | C  | C6 |    |
| ANGL | C5 | C4 | O  |    |
| ANGL | C6 | O3 | H5 |    |
| ANGL | O3 | C6 | O4 |    |
| DIHE | C  | C1 | C2 | C3 |
| DIHE | C  | C1 | C2 | O2 |
| DIHE | C  | C5 | C4 | C3 |
| DIHE | C  | C5 | C4 | O  |
| DIHE | C  | C6 | O3 | H5 |
| DIHE | C1 | C  | C5 | C4 |
| DIHE | C1 | C  | C5 | H1 |
| DIHE | C1 | C  | C6 | O3 |
| DIHE | C1 | C  | C6 | O4 |
| DIHE | C1 | C2 | C3 | C4 |
| DIHE | C1 | C2 | C3 | O1 |
| DIHE | C1 | C2 | O2 | H4 |
| DIHE | C2 | C1 | C  | C5 |
| DIHE | C2 | C1 | C  | C6 |
| DIHE | C2 | C3 | C4 | C5 |
| DIHE | C2 | C3 | C4 | O  |
| DIHE | C2 | C3 | O1 | H3 |
| DIHE | C3 | C2 | C1 | H  |
| DIHE | C3 | C2 | O2 | H4 |
| DIHE | C3 | C4 | C5 | H1 |
| DIHE | C3 | C4 | O  | H2 |
| DIHE | C4 | C3 | C2 | O2 |

|      |    |    |    |    |
|------|----|----|----|----|
| DIHE | C4 | C3 | 01 | H3 |
| DIHE | C4 | C5 | C  | C6 |
| DIHE | C5 | C  | C1 | H  |
| DIHE | C5 | C  | C6 | 03 |
| DIHE | C5 | C  | C6 | 04 |
| DIHE | C5 | C4 | C3 | 01 |
| DIHE | C5 | C4 | 0  | H2 |
| DIHE | C6 | C  | C1 | H  |
| DIHE | C6 | C  | C5 | H1 |
| DIHE | H  | C1 | C2 | 02 |
| DIHE | H1 | C5 | C4 | 0  |
| DIHE | H5 | 03 | C6 | 04 |
| DIHE | 0  | C4 | C3 | 01 |
| DIHE | 01 | C3 | C2 | 02 |
| IMPR | C  | C1 | C5 | C6 |
| IMPR | C1 | C2 | C  | H  |
| IMPR | C2 | C3 | C1 | 02 |
| IMPR | C3 | C4 | C2 | 01 |
| IMPR | C4 | C5 | C3 | 0  |
| IMPR | C6 | 03 | C  | 04 |
| IMPR | C5 | C4 | C  | H1 |

PATCHING FIRST NONE LAST NONE

```
! ~~~~~
! quercetin
! ~~~~~
```

|         |     |        |        |
|---------|-----|--------|--------|
| RESIDUE | QUE | 0.0000 |        |
| GROUP   |     |        |        |
| ATOM    | C5  | CB     | -0.15  |
| ATOM    | H1  | HCMM   | 0.15   |
| ATOM    | C   | CB     | 0.082  |
| ATOM    | 0   | OR     | -0.532 |
| ATOM    | H2  | HOCC   | 0.45   |
| ATOM    | C1  | CB     | -0.15  |
| ATOM    | H   | HCMM   | 0.15   |
| ATOM    | C2  | CB     | 0.082  |
| ATOM    | 01  | OR     | -0.532 |
| ATOM    | H3  | HOCC   | 0.45   |
| ATOM    | C3  | CB     | 0.086  |
| ATOM    | C4  | CB     | 0.082  |
| ATOM    | 02  | OR     | -0.159 |
| ATOM    | C6  | C=O    | 0.469  |
| ATOM    | 03  | O=C    | -0.569 |
| ATOM    | C7  | C=C    | 0.091  |
| ATOM    | 04  | OR     | -0.526 |
| ATOM    | H4  | HOCC   | 0.45   |
| ATOM    | C8  | C=C    | 0.048  |
| ATOM    | C9  | CB     | 0.028  |
| ATOM    | C10 | CB     | -0.15  |
| ATOM    | H5  | HCMM   | 0.15   |
| ATOM    | C11 | CB     | -0.15  |
| ATOM    | H6  | HCMM   | 0.15   |
| ATOM    | C12 | CB     | 0.082  |
| ATOM    | 05  | OR     | -0.532 |
| ATOM    | H8  | HOCC   | 0.45   |
| ATOM    | C13 | CB     | 0.082  |
| ATOM    | 06  | OR     | -0.532 |

|      |     |      |       |
|------|-----|------|-------|
| ATOM | H9  | HOCC | 0.45  |
| ATOM | C14 | CB   | -0.15 |
| ATOM | H7  | HCMM | 0.15  |
| BOND | C   | C1   |       |
| BOND | C   | C5   |       |
| BOND | C   | O    |       |
| BOND | C1  | C2   |       |
| BOND | C1  | H    |       |
| BOND | C2  | C3   |       |
| BOND | C2  | O1   |       |
| BOND | C3  | C4   |       |
| BOND | C3  | C6   |       |
| BOND | C4  | C5   |       |
| BOND | C4  | O2   |       |
| BOND | C5  | H1   |       |
| BOND | O   | H2   |       |
| BOND | O1  | H3   |       |
| BOND | C6  | C7   |       |
| BOND | C6  | O3   |       |
| BOND | C7  | C8   |       |
| BOND | C7  | O4   |       |
| BOND | C8  | O2   |       |
| BOND | C8  | C9   |       |
| BOND | O4  | H4   |       |
| BOND | C9  | C10  |       |
| BOND | C9  | C14  |       |
| BOND | C10 | C11  |       |
| BOND | C10 | H5   |       |
| BOND | C11 | C12  |       |
| BOND | C11 | H6   |       |
| BOND | C12 | C13  |       |
| BOND | C12 | O5   |       |
| BOND | C13 | C14  |       |
| BOND | C13 | O6   |       |
| BOND | C14 | H7   |       |
| BOND | O5  | H8   |       |
| BOND | O6  | H9   |       |
| ANGL | C   | C1   | C2    |
| ANGL | C   | C1   | H     |
| ANGL | C   | C5   | C4    |
| ANGL | C   | C5   | H1    |
| ANGL | C   | O    | H2    |
| ANGL | C1  | C    | C5    |
| ANGL | C1  | C    | O     |
| ANGL | C1  | C2   | C3    |
| ANGL | C1  | C2   | O1    |
| ANGL | C10 | C11  | C12   |
| ANGL | C10 | C11  | H6    |
| ANGL | C10 | C9   | C14   |
| ANGL | C10 | C9   | C8    |
| ANGL | C11 | C10  | C9    |
| ANGL | C11 | C10  | H5    |
| ANGL | C11 | C12  | C13   |
| ANGL | C11 | C12  | O5    |
| ANGL | C12 | C11  | H6    |
| ANGL | C12 | C13  | C14   |
| ANGL | C12 | C13  | O6    |



|      |     |     |     |     |
|------|-----|-----|-----|-----|
| ANGL | C12 | 05  | H8  |     |
| ANGL | C13 | C12 | 05  |     |
| ANGL | C13 | C14 | C9  |     |
| ANGL | C13 | C14 | H7  |     |
| ANGL | C13 | 06  | H9  |     |
| ANGL | C14 | C13 | 06  |     |
| ANGL | C14 | C9  | C8  |     |
| ANGL | C2  | C1  | H   |     |
| ANGL | C2  | C3  | C4  |     |
| ANGL | C2  | C3  | C6  |     |
| ANGL | C2  | 01  | H3  |     |
| ANGL | C3  | C2  | 01  |     |
| ANGL | C3  | C4  | C5  |     |
| ANGL | C3  | C4  | 02  |     |
| ANGL | C3  | C6  | C7  |     |
| ANGL | C3  | C6  | 03  |     |
| ANGL | C4  | C3  | C6  |     |
| ANGL | C4  | C5  | H1  |     |
| ANGL | C4  | 02  | C8  |     |
| ANGL | C5  | C   | 0   |     |
| ANGL | C5  | C4  | 02  |     |
| ANGL | C6  | C7  | C8  |     |
| ANGL | C6  | C7  | 04  |     |
| ANGL | C7  | C6  | 03  |     |
| ANGL | C7  | C8  | C9  |     |
| ANGL | C7  | C8  | 02  |     |
| ANGL | C7  | 04  | H4  |     |
| ANGL | C8  | C7  | 04  |     |
| ANGL | C9  | C10 | H5  |     |
| ANGL | C9  | C14 | H7  |     |
| ANGL | C9  | C8  | 02  |     |
| DIHE | C   | C1  | C2  | C3  |
| DIHE | C   | C1  | C2  | 01  |
| DIHE | C   | C5  | C4  | C3  |
| DIHE | C   | C5  | C4  | 02  |
| DIHE | C1  | C   | C5  | C4  |
| DIHE | C1  | C   | C5  | H1  |
| DIHE | C1  | C   | 0   | H2  |
| DIHE | C1  | C2  | C3  | C4  |
| DIHE | C1  | C2  | C3  | C6  |
| DIHE | C1  | C2  | 01  | H3  |
| DIHE | C10 | C11 | C12 | C13 |
| DIHE | C10 | C11 | C12 | 05  |
| DIHE | C10 | C9  | C14 | C13 |
| DIHE | C10 | C9  | C14 | H7  |
| DIHE | C10 | C9  | C8  | C7  |
| DIHE | C10 | C9  | C8  | 02  |
| DIHE | C11 | C10 | C9  | C14 |
| DIHE | C11 | C10 | C9  | C8  |
| DIHE | C11 | C12 | C13 | C14 |
| DIHE | C11 | C12 | C13 | 06  |
| DIHE | C11 | C12 | 05  | H8  |
| DIHE | C12 | C11 | C10 | C9  |
| DIHE | C12 | C11 | C10 | H5  |
| DIHE | C12 | C13 | C14 | C9  |
| DIHE | C12 | C13 | C14 | H7  |
| DIHE | C12 | C13 | 06  | H9  |

|      |     |     |     |    |
|------|-----|-----|-----|----|
| DIHE | C13 | C12 | C11 | H6 |
| DIHE | C13 | C12 | 05  | H8 |
| DIHE | C13 | C14 | C9  | C8 |
| DIHE | C14 | C13 | C12 | 05 |
| DIHE | C14 | C13 | 06  | H9 |
| DIHE | C14 | C9  | C10 | H5 |
| DIHE | C14 | C9  | C8  | C7 |
| DIHE | C14 | C9  | C8  | 02 |
| DIHE | C2  | C1  | C   | C5 |
| DIHE | C2  | C1  | C   | 0  |
| DIHE | C2  | C3  | C4  | C5 |
| DIHE | C2  | C3  | C4  | 02 |
| DIHE | C2  | C3  | C6  | C7 |
| DIHE | C2  | C3  | C6  | 03 |
| DIHE | C3  | C2  | C1  | H  |
| DIHE | C3  | C2  | 01  | H3 |
| DIHE | C3  | C4  | C5  | H1 |
| DIHE | C3  | C4  | 02  | C8 |
| DIHE | C3  | C6  | C7  | C8 |
| DIHE | C3  | C6  | C7  | 04 |
| DIHE | C4  | C3  | C2  | 01 |
| DIHE | C4  | C3  | C6  | C7 |
| DIHE | C4  | C3  | C6  | 03 |
| DIHE | C4  | C5  | C   | 0  |
| DIHE | C4  | 02  | C8  | C7 |
| DIHE | C4  | 02  | C8  | C9 |
| DIHE | C5  | C   | C1  | H  |
| DIHE | C5  | C   | 0   | H2 |
| DIHE | C5  | C4  | C3  | C6 |
| DIHE | C5  | C4  | 02  | C8 |
| DIHE | C6  | C3  | C2  | 01 |
| DIHE | C6  | C3  | C4  | 02 |
| DIHE | C6  | C7  | C8  | C9 |
| DIHE | C6  | C7  | C8  | 02 |
| DIHE | C6  | C7  | 04  | H4 |
| DIHE | C8  | C7  | C6  | 03 |
| DIHE | C8  | C7  | 04  | H4 |
| DIHE | C8  | C9  | C10 | H5 |
| DIHE | C8  | C9  | C14 | H7 |
| DIHE | C9  | C10 | C11 | H6 |
| DIHE | C9  | C14 | C13 | 06 |
| DIHE | C9  | C8  | C7  | 04 |
| DIHE | H   | C1  | C   | 0  |
| DIHE | H   | C1  | C2  | 01 |
| DIHE | H1  | C5  | C   | 0  |
| DIHE | H1  | C5  | C4  | 02 |
| DIHE | H5  | C10 | C11 | H6 |
| DIHE | H6  | C11 | C12 | 05 |
| DIHE | H7  | C14 | C13 | 06 |
| DIHE | 02  | C8  | C7  | 04 |
| DIHE | 03  | C6  | C7  | 04 |
| DIHE | 05  | C12 | C13 | 06 |
| IMPR | C   | C1  | C5  | 0  |
| IMPR | C1  | C2  | C   | H  |
| IMPR | C2  | C3  | C1  | 01 |
| IMPR | C3  | C4  | C2  | C6 |
| IMPR | C6  | C7  | C3  | 03 |

```

IMPR      C7      C8      C6      04
IMPR      C8      C9      C7      02
IMPR      C9      C14     C8      C10
IMPR      C10     C11     C9      H5
IMPR      C11     C12     C10     H6
IMPR      C12     C13     C11     05
IMPR      C13     C14     C12     06
IMPR      C5      C4      C       H1
IMPR      C14     C13     C9      H7

```

```

PATCHING FIRST NONE LAST NONE
END

```

```

READ PARA CARD FLEX

```

```

*.....
*. Force field parameters of the solutes
*.....
*

```

```

ATOMS

```

```

MASS  101 C5A      12.011
MASS  102 C5B      12.011
MASS  103 C=C      12.011
MASS  104 C=O      12.011
MASS  105 CB       12.011
MASS  106 CR       12.011
MASS  107 HCMM     1.008
MASS  108 HOCC     1.008
MASS  109 HOCO     1.008
MASS  110 N5B      14.007
MASS  111 NC=O     14.007
MASS  112 NPYL     14.007
MASS  113 O=C      15.999
MASS  114 OR       15.999

```

```

BONDS

```

```

!
! U_bond = k ( r - r0 )^2
!

```

```

!-----
!TYPE1      TYPE2      k [kcal/mol Angstroem^2]      r0 [Angstroem]
!-----
C5A         C5B         512.2560                        1.3770
C5A         C=O         393.5110                        1.4230
C5A         HCMM        398.0450                        1.0800
C5A         N5B         599.1910                        1.3130
C5A         NPYL        453.4590                        1.3640
C5B         N5B         320.6820                        1.3690
C5B         NC=O        428.3430                        1.3760
C=C         C=C         684.0390                        1.3330
C=C         C=O         328.5260                        1.4680
C=C         CB          360.3350                        1.4490
C=C         OR          397.2540                        1.3730
C=O         CB          322.9850                        1.4570
C=O         NC=O        419.4910                        1.3690
C=O         O=C         931.9630                        1.2220
C=O         OR          417.4760                        1.3550
CB          CB          401.0680                        1.3740

```

|      |      |          |        |
|------|------|----------|--------|
| CB   | HCMM | 381.8530 | 1.0840 |
| CB   | OR   | 404.0190 | 1.3760 |
| CR   | HCMM | 342.9910 | 1.0930 |
| CR   | NC=O | 335.6510 | 1.4360 |
| CR   | NPYL | 440.0020 | 1.4450 |
| HOCC | OR   | 564.1430 | 0.9730 |
| HOCO | OR   | 532.7660 | 0.9810 |

ANGLES

!  
! U\_angle = k ( theta - theta0 )^2  
!

```

!-----
!TYPE1      TYPE2      TYPE3      k [kcal/mol rad^2]      theta0 [deg]
!-----
C5A         C5B         N5B         74.7000      111.6000
C5A         C5B         NC=O        67.4320      123.7000
C5A         C=O         NC=O        77.3630      114.6000
C5A         C=O         O=C         74.5560      126.5000
C5A         N5B         C5B         86.7910      103.8000
C5A         NPYL        C5A         82.9040      109.6000
C5A         NPYL        CR          61.4590      123.4000
C5B         C5A         C=O         55.1260      130.1000
C5B         C5A         NPYL        58.5080      107.3000
C5B         NC=O        C=O         75.4200      117.6000
C5B         NC=O        CR          69.0870      121.3000
C=C         C=C         C=O         39.2210      111.3000
C=C         C=C         CB          43.0350      117.5000
C=C         C=C         OR          80.3860      121.3000
C=C         C=O         CB          70.0230      112.9000
C=C         C=O         O=C         67.3600      122.6000
C=C         CB          CB          51.2400      119.7000
C=C         OR          CB          102.0470     110.7000
C=C         OR          HOCC        58.7240      105.7000
C=O         C5A         NPYL        64.7690      125.4000
C=O         C=C         OR          82.1850      116.7000
C=O         CB          CB          57.4290      114.5000
C=O         NC=O        C=O         51.0240      120.3000
C=O         NC=O        CR          59.0840      119.6000
C=O         OR          HOCO        41.9560      111.9000
CB          C=C         OR          86.2150      114.4000
CB          C=O         O=C         52.8230      120.0000
CB          C=O         OR          58.1480      102.9000
CB          CB          CB          48.1450      120.0000
CB          CB          HCMM        40.5170      120.6000
CB          CB          OR          69.6630      116.5000
CB          OR          HOCC        52.2470      105.4000
HCMM        C5A         N5B         46.2740      125.1000
HCMM        C5A         NPYL        44.4030      121.1000
HCMM        CR          HCMM        37.1340      108.8000
HCMM        CR          NC=O        53.2550      107.6000
HCMM        CR          NPYL        58.3640      106.3000
N5B         C5A         NPYL        72.8290      110.9000
N5B         C5B         NC=O        76.6430      121.1000
NC=O        C=O         NC=O        116.0090     114.9000
NC=O        C=O         O=C         65.2730      127.2000
O=C         C=O         OR          83.1200      124.4000

```

## DIHEDRALS

!  
 ! U\_dihedral = k ( 1 + Cos[n phi - delta] )  
 !

| !TYPE1 | TYPE2 | TYPE3 | TYPE4 | k [kcal/mol] | n | delta [deg] |
|--------|-------|-------|-------|--------------|---|-------------|
| C5A    | C5B   | N5B   | C5A   | 3.5000       | 2 | 180.0000    |
| C5A    | C5B   | NC=O  | C=O   | 3.0000       | 2 | 180.0000    |
| C5A    | C5B   | NC=O  | CR    | 3.0000       | 2 | 180.0000    |
| C5A    | C=O   | NC=O  | C=O   | 3.0000       | 2 | 180.0000    |
| C5A    | C=O   | NC=O  | CR    | 3.0000       | 2 | 180.0000    |
| C5A    | N5B   | C5B   | NC=O  | 3.5000       | 2 | 180.0000    |
| C5A    | NPYL  | C5A   | C5B   | 2.0000       | 2 | 180.0000    |
| C5A    | NPYL  | C5A   | C=O   | 2.0000       | 2 | 180.0000    |
| C5A    | NPYL  | C5A   | HCMM  | 2.0000       | 2 | 180.0000    |
| C5A    | NPYL  | C5A   | N5B   | 2.0000       | 2 | 180.0000    |
| C5A    | NPYL  | CR    | HCMM  | -0.0570      | 3 | 0.0000      |
| C5B    | C5A   | C=O   | NC=O  | 1.2500       | 2 | 180.0000    |
| C5B    | C5A   | C=O   | O=C   | 1.2500       | 2 | 180.0000    |
| C5B    | C5A   | NPYL  | CR    | 2.0000       | 2 | 180.0000    |
| C5B    | N5B   | C5A   | HCMM  | 3.5000       | 2 | 180.0000    |
| C5B    | N5B   | C5A   | NPYL  | 3.5000       | 2 | 180.0000    |
| C5B    | NC=O  | C=O   | NC=O  | 3.0000       | 2 | 180.0000    |
| C5B    | NC=O  | C=O   | O=C   | 3.0000       | 2 | 180.0000    |
| C5B    | NC=O  | CR    | HCMM  | 0.1500       | 3 | 0.0000      |
| C=C    | C=C   | C=O   | CB    | 1.2500       | 2 | 180.0000    |
| C=C    | C=C   | C=O   | O=C   | 1.2500       | 2 | 180.0000    |
| C=C    | C=C   | CB    | CB    | 0.2170       | 3 | 0.0000      |
| C=C    | C=C   | CB    | CB    | 0.7710       | 2 | 180.0000    |
| C=C    | C=C   | OR    | CB    | 1.5500       | 2 | 180.0000    |
| C=C    | C=C   | OR    | HOCC  | 1.4050       | 2 | 180.0000    |
| C=C    | C=C   | OR    | HOCC  | -0.1070      | 1 | 0.0000      |
| C=C    | C=C   | OR    | HOCC  | -0.2280      | 3 | 0.0000      |
| C=C    | C=O   | CB    | CB    | 1.2500       | 2 | 180.0000    |
| C=C    | CB    | CB    | CB    | 1.0000       | 2 | 180.0000    |
| C=C    | CB    | CB    | HCMM  | 1.0000       | 2 | 180.0000    |
| C=C    | OR    | CB    | CB    | 1.6000       | 2 | 180.0000    |
| C=O    | C5A   | C5B   | N5B   | 3.5000       | 2 | 180.0000    |
| C=O    | C5A   | C5B   | NC=O  | 0.0000       | 1 | 0.0000      |
| C=O    | C5A   | NPYL  | CR    | 3.0000       | 2 | 180.0000    |
| C=O    | C=C   | C=C   | CB    | 0.9000       | 2 | 180.0000    |
| C=O    | C=C   | C=C   | OR    | 0.9000       | 2 | 180.0000    |
| C=O    | C=C   | OR    | HOCC  | 1.8000       | 2 | 180.0000    |
| C=O    | CB    | CB    | CB    | 3.5000       | 2 | 180.0000    |
| C=O    | CB    | CB    | HCMM  | 1.0000       | 2 | 180.0000    |
| C=O    | CB    | CB    | OR    | 1.0000       | 2 | 180.0000    |
| C=O    | NC=O  | C5B   | N5B   | 3.0000       | 2 | 180.0000    |
| C=O    | NC=O  | C=O   | NC=O  | 3.0000       | 2 | 180.0000    |
| C=O    | NC=O  | C=O   | O=C   | 0.3880       | 1 | 0.0000      |
| C=O    | NC=O  | C=O   | O=C   | -0.0720      | 3 | 0.0000      |
| C=O    | NC=O  | C=O   | O=C   | -0.2920      | 2 | 180.0000    |
| C=O    | NC=O  | CR    | HCMM  | 0.0110       | 3 | 0.0000      |
| C=O    | NC=O  | CR    | HCMM  | 0.6810       | 2 | 180.0000    |
| C=O    | NC=O  | CR    | HCMM  | -1.0500      | 1 | 0.0000      |
| CB     | C=C   | C=C   | OR    | 0.9000       | 2 | 180.0000    |

|      |      |     |      |         |   |          |
|------|------|-----|------|---------|---|----------|
| CB   | C=C  | OR  | CB   | 1.5500  | 2 | 180.0000 |
| CB   | C=O  | C=C | OR   | 1.2500  | 2 | 180.0000 |
| CB   | C=O  | OR  | HOCO | 1.9460  | 2 | 180.0000 |
| CB   | C=O  | OR  | HOCO | -0.0470 | 3 | 0.0000   |
| CB   | CB   | C=C | OR   | 1.0000  | 2 | 180.0000 |
| CB   | CB   | C=O | O=C  | 1.1280  | 2 | 180.0000 |
| CB   | CB   | C=O | OR   | 0.8710  | 2 | 180.0000 |
| CB   | CB   | CB  | CB   | 3.5000  | 2 | 180.0000 |
| CB   | CB   | CB  | HCMM | 3.5000  | 2 | 180.0000 |
| CB   | CB   | CB  | OR   | 3.5000  | 2 | 180.0000 |
| CB   | CB   | OR  | HOC  | 1.4010  | 2 | 180.0000 |
| CR   | NC=O | C5B | N5B  | 3.0000  | 2 | 180.0000 |
| CR   | NC=O | C=O | NC=O | 3.0000  | 2 | 180.0000 |
| CR   | NC=O | C=O | O=C  | 3.1470  | 2 | 180.0000 |
| CR   | NC=O | C=O | O=C  | -0.0730 | 3 | 0.0000   |
| CR   | NC=O | C=O | O=C  | -0.1600 | 1 | 0.0000   |
| CR   | NPYL | C5A | HCMM | 2.0000  | 2 | 180.0000 |
| CR   | NPYL | C5A | N5B  | 2.0000  | 2 | 180.0000 |
| HCMM | CB   | CB  | HCMM | 3.5000  | 2 | 180.0000 |
| HCMM | CB   | CB  | OR   | 3.5000  | 2 | 180.0000 |
| HOCO | OR   | C=O | O=C  | 0.8310  | 1 | 0.0000   |
| HOCO | OR   | C=O | O=C  | 3.0760  | 2 | 180.0000 |
| HOCO | OR   | C=O | O=C  | -0.0290 | 3 | 0.0000   |
| N5B  | C5B  | C5A | NPYL | 3.5000  | 2 | 180.0000 |
| NC=O | C5B  | C5A | NPYL | 3.5000  | 2 | 180.0000 |
| NC=O | C=O  | C5A | NPYL | 1.2500  | 2 | 180.0000 |
| NPYL | C5A  | C=O | O=C  | 1.2500  | 2 | 180.0000 |
| O=C  | C=O  | C=C | OR   | 1.2500  | 2 | 180.0000 |
| OR   | C=C  | C=C | OR   | 6.0000  | 2 | 180.0000 |
| OR   | CB   | CB  | OR   | 3.5000  | 2 | 180.0000 |

IMPROPERS

```
! n > 0:
! U_improper = k ( 1 + Cos[n phi - delta] )
!
! n = 0:
! U_improper = k ( phi - delta )^2
!
```

| !TYPE1 | TYPE2 | TYPE3 | TYPE4 | k [kcal/mol] | n   | delta [deg] |
|--------|-------|-------|-------|--------------|-----|-------------|
| C5A    | C5B   | NPYL  | C=O   | 3.5980       | 0.0 | 0.0000      |
| C5A    | N5B   | NPYL  | HCMM  | 4.8940       | 0.0 | 0.0000      |
| C5B    | C5A   | N5B   | NC=O  | 2.8790       | 0.0 | 0.0000      |
| C=C    | C=C   | C=O   | OR    | 1.4390       | 0.0 | 0.0000      |
| C=C    | CB    | C=C   | OR    | 1.4390       | 0.0 | 0.0000      |
| C=O    | C=C   | CB    | O=C   | 9.3560       | 0.0 | 0.0000      |
| C=O    | NC=O  | C5A   | O=C   | 9.3560       | 0.0 | 0.0000      |
| C=O    | NC=O  | NC=O  | O=C   | 8.1320       | 0.0 | 0.0000      |
| C=O    | OR    | CB    | O=C   | 9.1400       | 0.0 | 0.0000      |
| CB     | CB    | C=C   | CB    | 2.2310       | 0.0 | 0.0000      |
| CB     | CB    | CB    | C=O   | 1.9430       | 0.0 | 0.0000      |
| CB     | CB    | CB    | HCMM  | 1.0790       | 0.0 | 0.0000      |
| CB     | CB    | CB    | OR    | 3.4540       | 0.0 | 0.0000      |
| CR     | HCMM  | NC=O  | HCMM  | 0.0000       | 0.0 | 0.0000      |

|      |      |      |      |         |     |        |
|------|------|------|------|---------|-----|--------|
| CR   | HCMM | NPYL | HCMM | 0.0000  | 0.0 | 0.0000 |
| NC=O | C=O  | C5B  | CR   | -1.4390 | 0.0 | 0.0000 |
| NC=O | C=O  | C=O  | CR   | -1.4390 | 0.0 | 0.0000 |
| NPYL | C5A  | C5A  | CR   | 0.8640  | 0.0 | 0.0000 |

NONBONDED NBXMOD 5

```

!-----
! TYPE1          epsilon    rmin/2          epsilon14    rmin14/2
!                [kcal/mol] [Angstroem]    [kcal/mol] [Angstroem]
!-----
C5A      0.00    -0.05000    2.04000
C5B      0.00    -0.05000    2.04000
C=C      0.00    -0.06800    2.09000
C=O      0.00    -0.11000    2.00000
CB       0.00    -0.07000    1.99240
CR       0.00    -0.05500    2.17500  0.00    -0.01000    2.17500
HCMM     0.00    -0.02200    1.32000
HOCC     0.00    -0.04600    0.22450
HOCO     0.00    -0.04600    0.22450
N5B      0.00    -0.20000    1.85000
NC=O     0.00    -0.20000    1.85000
NPYL     0.00    -0.09000    1.72000
O=C      0.00    -0.12000    1.70000
OR       0.00    -0.15210    1.77000
END

```

# FORCE FIELD OF THE SOLVENTS

```

=====
*. Force field of the solvent species
=====
*

READ RTF CARD
*.....
*. Topology of the solvents
*.....
*
    99      1

MASS      1 H1      1.008000
MASS      2 H4      1.008000
MASS      3 H5      1.008000
MASS      4 HC      1.008000
MASS      5 HT      1.008000
MASS      6 C3     12.010000
MASS      7 CC     12.010000
MASS      8 CD     12.010000
MASS      9 CT     12.010000
MASS     10 C      12.010000
MASS     11 NA     14.010000
MASS     12 OA     16.000000
MASS     13 OT     16.000000

! ~~~~~
! water
! ~~~~~
RESIDUE SPCE      0.000 ! spce water model, generate using noangle
      nodihedral
GROUP
ATOM OH2  OT      -0.848
ATOM H1   HT       0.424
ATOM H2   HT       0.424
BOND OH2 H1 OH2 H2 H1 H2      ! the last bond is needed for shake
ANGLE H1 OH2 H2                ! required
DONOR H1 OH2
DONOR H2 OH2
ACCEPTOR OH2
PATCHING FIRS NONE LAST NONE

! ~~~~~
! EMIM
! ~~~~~
RESIDUE EMIM      1.000
GROUP
ATOM C     C3      -0.110 !           H
ATOM H     H1       0.117 !           |
ATOM H1    H1       0.117 !           H1--C--H2
ATOM H2    H1       0.117 !           |
ATOM N     NA       0.085 !           N1
ATOM C1    CC      -0.027 !           //      \
ATOM H3    H5       0.230 !           //      C2--H4

```



|          |     |          |            |     |          |
|----------|-----|----------|------------|-----|----------|
| ATOM C2  | CC  | -0.189 ! | H3--C1     |     |          |
| ATOM H4  | H4  | 0.253 !  |            | \   | C3--H5   |
| ATOM N1  | NA  | 0.085 !  |            | \   | /        |
| ATOM C3  | CD  | -0.189 ! |            | N   |          |
| ATOM H5  | H4  | 0.253 !  |            |     |          |
| ATOM C4  | C3  | -0.043 ! | H6--C4--H7 |     |          |
| ATOM H6  | H1  | 0.105 !  |            |     |          |
| ATOM H7  | H1  | 0.105 !  | H8--C5--H9 |     |          |
| ATOM C5  | C3  | -0.107 ! |            |     |          |
| ATOM H8  | HC  | 0.066 !  |            | H10 |          |
| ATOM H9  | HC  | 0.066 !  |            |     |          |
| ATOM H10 | HC  | 0.066 !  |            |     |          |
| BOND C   | H   |          | ! dist     |     | 1.0796   |
| BOND C   | H1  |          | ! dist     |     | 1.0785   |
| BOND C   | H2  |          | ! dist     |     | 1.0794   |
| BOND C   | N1  |          | ! dist     |     | 1.4658   |
| BOND N   | C1  |          | ! dist     |     | 1.3138   |
| BOND N   | C3  |          | ! dist     |     | 1.3781   |
| BOND N   | C4  |          | ! dist     |     | 1.4777   |
| BOND C1  | N1  |          | ! dist     |     | 1.3157   |
| BOND C1  | H3  |          | ! dist     |     | 1.0692   |
| BOND N1  | C2  |          | ! dist     |     | 1.3785   |
| BOND C2  | C3  |          | ! dist     |     | 1.3416   |
| BOND C2  | H4  |          | ! dist     |     | 1.0679   |
| BOND C3  | H5  |          | ! dist     |     | 1.0688   |
| BOND C4  | H6  |          | ! dist     |     | 1.0814   |
| BOND C4  | H7  |          | ! dist     |     | 1.0798   |
| BOND C4  | C5  |          | ! dist     |     | 1.5218   |
| BOND C5  | H8  |          | ! dist     |     | 1.0835   |
| BOND C5  | H9  |          | ! dist     |     | 1.0834   |
| BOND C5  | H10 |          | ! dist     |     | 1.0837   |
| ANGL C   | N1  | C1       | ! angle    |     | 126.4111 |
| ANGL C   | N1  | C2       | ! angle    |     | 125.6300 |
| ANGL H   | C   | H1       | ! angle    |     | 109.5510 |
| ANGL H   | C   | H2       | ! angle    |     | 110.2559 |
| ANGL H   | C   | N1       | ! angle    |     | 109.2611 |
| ANGL H1  | C   | H2       | ! angle    |     | 109.5172 |
| ANGL H1  | C   | N1       | ! angle    |     | 108.8792 |
| ANGL H2  | C   | N1       | ! angle    |     | 109.3538 |
| ANGL N   | C1  | N1       | ! angle    |     | 109.8941 |
| ANGL N   | C1  | H3       | ! angle    |     | 125.1030 |
| ANGL N   | C3  | C2       | ! angle    |     | 107.1959 |
| ANGL N   | C3  | H5       | ! angle    |     | 122.1025 |
| ANGL N   | C4  | H6       | ! angle    |     | 106.7043 |
| ANGL N   | C4  | H7       | ! angle    |     | 106.9082 |
| ANGL N   | C4  | C5       | ! angle    |     | 112.0836 |
| ANGL C1  | N   | C3       | ! angle    |     | 107.9285 |
| ANGL C1  | N   | C4       | ! angle    |     | 126.1921 |
| ANGL C1  | N1  | C2       | ! angle    |     | 107.9577 |
| ANGL N1  | C1  | H3       | ! angle    |     | 125.0025 |
| ANGL N1  | C2  | C3       | ! angle    |     | 107.0236 |
| ANGL N1  | C2  | H4       | ! angle    |     | 122.0406 |
| ANGL C2  | C3  | H5       | ! angle    |     | 130.7003 |
| ANGL C3  | N   | C4       | ! angle    |     | 125.8669 |
| ANGL C3  | C2  | H4       | ! angle    |     | 130.9352 |
| ANGL C4  | C5  | H8       | ! angle    |     | 111.2780 |
| ANGL C4  | C5  | H9       | ! angle    |     | 111.5813 |

|       |       |      |      |      |       |          |           |
|-------|-------|------|------|------|-------|----------|-----------|
| ANGL  | C4    | C5   | H10  | !    | angle | 109.0336 |           |
| ANGL  | H6    | C4   | H7   | !    | angle | 107.7086 |           |
| ANGL  | H6    | C4   | C5   | !    | angle | 111.3594 |           |
| ANGL  | H7    | C4   | C5   | !    | angle | 111.7864 |           |
| ANGL  | H8    | C5   | H9   | !    | angle | 108.5717 |           |
| ANGL  | H8    | C5   | H10  | !    | angle | 108.3168 |           |
| ANGL  | H9    | C5   | H10  | !    | angle | 107.9497 |           |
| DIHE  | H     | C    | N1   | C1   | !     | dihe     | -120.0991 |
| DIHE  | H1    | C    | N1   | C1   | !     | dihe     | -0.4861   |
| DIHE  | H2    | C    | N1   | C1   | !     | dihe     | 119.1407  |
| DIHE  | H     | C    | N1   | C2   | !     | dihe     | 60.3500   |
| DIHE  | H1    | C    | N1   | C2   | !     | dihe     | 179.9630  |
| DIHE  | H2    | C    | N1   | C2   | !     | dihe     | -60.4102  |
| DIHE  | C3    | N    | C1   | N1   | !     | dihe     | -0.0723   |
| DIHE  | C4    | N    | C1   | N1   | !     | dihe     | -178.8479 |
| DIHE  | C3    | N    | C1   | H3   | !     | dihe     | -179.8641 |
| DIHE  | C4    | N    | C1   | H3   | !     | dihe     | 1.3603    |
| DIHE  | C1    | N    | C3   | C2   | !     | dihe     | 0.1214    |
| DIHE  | C4    | N    | C3   | C2   | !     | dihe     | 178.9021  |
| DIHE  | C1    | N    | C3   | H5   | !     | dihe     | 179.7449  |
| DIHE  | C4    | N    | C3   | H5   | !     | dihe     | -1.4744   |
| DIHE  | C1    | N    | C4   | H6   | !     | dihe     | -17.3257  |
| DIHE  | C3    | N    | C4   | H6   | !     | dihe     | 164.1119  |
| DIHE  | C1    | N    | C4   | H7   | !     | dihe     | -132.3592 |
| DIHE  | C3    | N    | C4   | H7   | !     | dihe     | 49.0783   |
| DIHE  | C1    | N    | C4   | C5   | !     | dihe     | 104.8236  |
| DIHE  | C3    | N    | C4   | C5   | !     | dihe     | -73.7389  |
| DIHE  | N     | C1   | N1   | C    | !     | dihe     | -179.6202 |
| DIHE  | H3    | C1   | N1   | C    | !     | dihe     | 0.1719    |
| DIHE  | N     | C1   | N1   | C2   | !     | dihe     | -0.0039   |
| DIHE  | H3    | C1   | N1   | C2   | !     | dihe     | 179.7882  |
| DIHE  | C     | N1   | C2   | C3   | !     | dihe     | 179.7003  |
| DIHE  | C1    | N1   | C2   | C3   | !     | dihe     | 0.0802    |
| DIHE  | C     | N1   | C2   | H4   | !     | dihe     | -0.0517   |
| DIHE  | C1    | N1   | C2   | H4   | !     | dihe     | -179.6718 |
| DIHE  | N1    | C2   | C3   | N    | !     | dihe     | -0.1217   |
| DIHE  | H4    | C2   | C3   | N    | !     | dihe     | 179.6001  |
| DIHE  | N1    | C2   | C3   | H5   | !     | dihe     | -179.7009 |
| DIHE  | H4    | C2   | C3   | H5   | !     | dihe     | 0.0208    |
| DIHE  | N     | C4   | C5   | H8   | !     | dihe     | -60.5075  |
| DIHE  | H6    | C4   | C5   | H8   | !     | dihe     | 58.9472   |
| DIHE  | H7    | C4   | C5   | H8   | !     | dihe     | 179.4809  |
| DIHE  | N     | C4   | C5   | H9   | !     | dihe     | 60.9322   |
| DIHE  | H6    | C4   | C5   | H9   | !     | dihe     | -179.6130 |
| DIHE  | H7    | C4   | C5   | H9   | !     | dihe     | -59.0794  |
| DIHE  | N     | C4   | C5   | H10  | !     | dihe     | -179.9216 |
| DIHE  | H6    | C4   | C5   | H10  | !     | dihe     | -60.4668  |
| DIHE  | H7    | C4   | C5   | H10  | !     | dihe     | 60.0669   |
| IMPH  | C4    | C1   | N    | C3   |       |          |           |
| IMPH  | H3    | N1   | C1   | N    |       |          |           |
| IMPH  | C     | C1   | N1   | C2   |       |          |           |
| IMPH  | C3    | H4   | C2   | N1   |       |          |           |
| IMPH  | C2    | H5   | C3   | N    |       |          |           |
| DONOR | H3    | C1   |      |      |       |          |           |
| DONOR | H4    | C2   |      |      |       |          |           |
| DONOR | H5    | C3   |      |      |       |          |           |
| PATCH | FIRST | NONE | LAST | NONE |       |          |           |

```
! ~~~~~
! acetate
! ~~~~~
```

RESIDUE OAC -1.000

GROUP

```

ATOM C    C3      -0.218 !      H2    0
ATOM H    HC       0.010 !      |    /
ATOM H1   HC       0.010 !  H--C---C1
ATOM H2   HC       0.010 !      |    \
ATOM C1    C       0.774 !      H1    01
ATOM O    OA      -0.793 !
ATOM O1   OA      -0.793 !

BOND C    H              ! dist    1.0885
BOND C    H1             ! dist    1.0890
BOND C    H2             ! dist    1.0858
BOND C    C1             ! dist    1.5538
BOND C1   O              ! dist    1.2333
BOND C1   O1             ! dist    1.2354
ANGL C    C1    0        ! angle   116.0140
ANGL C    C1    O1       ! angle   114.5436
ANGL H    C    H1       ! angle   106.6972
ANGL H    C    H2       ! angle   109.2573
ANGL H    C    C1       ! angle   109.6829
ANGL H1   C    H2       ! angle   109.2436
ANGL H1   C    C1       ! angle   109.7254
ANGL H2   C    C1       ! angle   112.0849
ANGL O    C1    O1       ! angle   129.4425
DIHE H    C    C1    0   ! dihe    -121.4873
DIHE H1   C    C1    0   ! dihe    121.6133
DIHE H2   C    C1    0   ! dihe     0.0569
DIHE H    C    C1    O1  ! dihe    58.5127
DIHE H1   C    C1    O1  ! dihe   -58.3867
DIHE H2   C    C1    O1  ! dihe  -179.9431
IMPH C    O    C1    O1

ACCEPTOR  0  C1
ACCEPTOR  O1 C1
PATCH FIRST NONE LAST NONE
END
```

READ PARA CARD FLEX

```

*.....
*. Force field parameters of the solvents
*.....
*
```

ATOMS

```

MASS      1  H1      1.008000
MASS      2  H4      1.008000
MASS      3  H5      1.008000
MASS      4  HC      1.008000
MASS      5  HT      1.008000
MASS      6  C3     12.010000
MASS      7  CC     12.010000
MASS      8  CD     12.010000
MASS      9  CT     12.010000
```

```

MASS    10  C      12.010000
MASS    11  NA     14.010000
MASS    12  OA     16.000000
MASS    13  OT     16.000000

```

BONDS

```

!
! U_bond = k ( r - r0 )^2
!

```

```

!-----
!TYPE1   TYPE2      k [kcal/mol Angstroem^2]      r0 [Angstroem]
!-----
HT       HT         0.0                          1.632980862
HT       OT         450.0                        1.0000
C3       H1         335.90                       1.093
C3       NA         334.70                       1.456
CC       NA         438.80                       1.371
CD       NA         438.80                       1.371
CC       H5         356.00                       1.079
CC       CD         504.00                       1.371
CC       H4         350.10                       1.083
CD       H4         350.10                       1.083
C3       C3         303.10                       1.535
C3       HC         337.30                       1.092
C        C3         328.30                       1.508
C        OA         648.00                       1.214

```

ANGLES

```

!
! U_angle = k ( theta - theta0 )^2
!

```

```

!-----
!TYPE1   TYPE2     TYPE3      k [kcal/mol rad^2]      theta0 [deg]
!-----
HT       OT       HT         55.0                109.4667
C3       NA       CC         62.560              125.090
H1       C3       H1         39.180              109.550
H1       C3       NA         49.900              109.450
NA       CC       NA         73.650              109.330      ! SAME AS
NA C2 NA
NA       CC       H5         49.760              122.100
NA       CD       CC         72.910              109.420
NA       CD       H4         50.220              119.660
NA       C3       C3         65.730              112.810
CC       NA       CD         63.880              128.010
CC       NA       CC         68.940              109.900
NA       CC       CD         72.910              109.420
NA       CC       H4         50.220              119.660
CC       CD       H4         47.190              129.110
CD       NA       C3         62.560              125.090
CD       CC       H4         47.190              129.110
C3       C3       HC         46.370              110.050
H1       C3       C3         46.360              110.070
HC       C3       HC         39.430              108.350
C3       C        OA         68.030              123.110
HC       C3       C          47.200              109.680
OA       C        OA         78.170              130.380

```

## DIHEDRALS

```

!
! U_dihedral = k ( 1 + Cos[n phi - delta] )
!
!-----
!TYPE1      TYPE2      TYPE3      TYPE4      k [kcal/mol]      n      delta [deg]
!-----
X           C3          NA          X           0.000            2       0.0
X           CC          NA          X           1.700            2      180.0
X           CD          NA          X           1.700            2      180.0
X           CC          CD          X           4.000            2      180.0
X           C3          C3          X           0.156            3       0.0
CC          NA          C3          C3          0.049            1       0.0
CC          NA          C3          C3          0.284            2      180.0
CC          NA          C3          C3          0.301            3      180.0
CC          NA          C3          C3          0.025            6       0.0
X           C           C3          X           0.000            2      180.0
HC          C3          C           OA          0.800            1       0.0
HC          C3          C           OA          0.080            3      180.0

```

## IMPROPERS

```

! n > 0:
! U_improper = k ( 1 + Cos[n phi - delta] )
!
! n = 0:
! U_improper = k ( phi - delta )^2
!
!-----
!TYPE1      TYPE2      TYPE3      TYPE4      k [kcal/mol]      n      delta [deg]
!-----
C3          CC          NA          CD          1.100            2      180.0
H5          NA          CC          NA          1.100            2      180.0
C3          CC          NA          CC          1.100            2      180.0
CD          H4          CC          NA          1.100            2      180.0
CC          H4          CD          NA          1.100            2      180.0

```

## NONBONDED NBXMOD 5

```

!-----
!TYPE1      epsilon      rmin/2      epsilon14      rmin14/2
!           [kcal/mol] [Angstroem]      [kcal/mol] [Angstroem]
!-----
HT          0.00      -0.0000      0.0000
OT          0.00      -0.15210     1.7770
C3          0.00      -0.1094      1.9080      0.00      -0.0547      1.9080
H1          0.00      -0.0157      1.3870      0.00      -0.00775     1.3870
NA          0.00      -0.1700      1.8240      0.00      -0.0850      1.8240
CC          0.00      -0.0860      1.9080      0.00      -0.0430      1.9080
CD          0.00      -0.0860      1.9080      0.00      -0.0430      1.9080
H5          0.00      -0.0150      1.3590      0.00      -0.0075      1.3590
H4          0.00      -0.0150      1.4090      0.00      -0.0075      1.4090
HC          0.00      -0.0157      1.4870      0.00      -0.00775     1.4870
C           0.00      -0.0860      1.9080      0.00      -0.0430      1.9080
OA          0.00      -0.2100      1.6612      0.00      -0.1050      1.6612
END

```

## HYDROGEN BONDS AND EXTRACTION YIELDS

|             | $c_{IL}$ [% wt] | water   | HBONDS     |         | extraction yield [%] |
|-------------|-----------------|---------|------------|---------|----------------------|
|             |                 |         | $C_2mim^+$ | $OAc^-$ |                      |
| caffeine    |                 |         |            |         |                      |
|             | 0               | 3.1±1.0 |            |         | 0.219±0.019          |
|             | 10              |         |            |         | 0.167±0.013          |
|             | 18              | 2.7±1.0 | 0.0±0.1    | 0.0±0.1 |                      |
|             | 25              |         |            |         | 0.171±0.026          |
|             | 36              | 2.3±1.0 | 0.0±0.1    | 0.0±0.1 |                      |
|             | 40              |         |            |         | 0.204±0.010          |
|             | 70              | 0.8±0.8 | 0.1±0.2    | 0.0±0.2 |                      |
|             | 75              |         |            |         | 0.214±0.026          |
|             | 90              |         |            |         | 0.151±0.005          |
|             | 100             |         | 0.1±0.3    | 0.1±0.3 | 0.046±0.007          |
| gallic acid |                 |         |            |         |                      |
|             | 0               | 6.5±1.5 |            |         | 0.261±0.043          |
|             | 10              |         |            |         | 0.192±0.014          |
|             | 18              | 5.4±1.5 | 0.0±0.1    | 0.4±0.6 |                      |
|             | 25              |         |            |         | 0.200±0.021          |
|             | 36              | 4.6±1.4 | 0.0±0.2    | 0.9±0.6 |                      |
|             | 40              |         |            |         | 0.190±0.029          |
|             | 70              | 1.7±1.1 | 0.1±0.2    | 3.5±0.8 |                      |
|             | 75              |         |            |         | 0.194±0.010          |
|             | 90              |         |            |         | 0.053±0.005          |
|             | 100             |         | 0.2±0.5    | 3.9±0.5 | 0.046±0.000          |
| quercetin   |                 |         |            |         |                      |
|             | 0               | 7.9±1.7 |            |         | 0.141±0.026          |
|             | 10              |         |            |         | 0.177±0.008          |
|             | 18              | 6.5±1.7 | 0.0±0.2    | 0.5±0.6 |                      |
|             | 25              |         |            |         | 0.183±0.010          |
|             | 36              | 5.4±1.6 | 0.1±0.2    | 1.1±0.8 |                      |
|             | 40              |         |            |         | 0.181±0.014          |
|             | 70              | 2.1±1.2 | 0.1±0.4    | 3.4±0.8 |                      |
|             | 75              |         |            |         | 0.188±0.020          |
|             | 90              |         |            |         | 0.179±0.013          |
|             | 100             |         | 0.2±0.4    | 4.7±0.6 | 0.142±0.005          |
